# Supplementary material for: Fcγ-Receptor-Based Enzyme-Linked Immunosorbent Assays for Sensitive, Specific, and Persistent Detection of Anti-SARS-CoV-2 Nucleocapsid Protein IgG Antibodies in Human Sera
Source: PubMed Central journal article supplement (PMC9199419; doi:10.1128/jcm.00075-22), 2022-05-16
Supplement: jcm.00075-22-s0002.pdf [file jcm.00075-22-s0002.pdf]

| recombinant protein                         | accession no. full length NCP | calculated MW (# amino acids)                                 | oligonucleotides used for cloning                                                                                             | remarks                            |
|---------------------------------------------|-------------------------------|---------------------------------------------------------------|-------------------------------------------------------------------------------------------------------------------------------|------------------------------------|
| <b>SARS-CoV-2 NCP<math>\Delta</math>246</b> | QHW06046.1                    | with tag: 47.3 kDa (413 aa)<br>without tag: 19.5 kDa (175 aa) | 5' – AAGTTCTGTTTCAGGGCCCCGACTAAGAAATCTGCTGCTGAGGC – 3'<br>5' – <u>CTGGTCTAGAAAGCTT</u> TTAGGCCTGAGTTGAGTCAGCAC – 3'           |                                    |
| <b>SARS-CoV-1 NCP<math>\Delta</math>247</b> | AAP33707.1                    | with tag: 47.5 kDa (415 aa)<br>without tag: 19.7 (177 aa)     | 5' – AAGTTCTGTTTCAGGGCCCCGACTAAGAAATCTGCTGCTGAGGCATC – 3'<br>5' – <u>CTGGTCTAGAAAGCTT</u> TTATGCCTGAGTTGAATCAGCAGAAG – 3'     |                                    |
| <b>MERS NCP<math>\Delta</math>238</b>       | AGN70936.1                    | with tag: 47.8 kDa (415 aa)<br>without tag: 20.0 kDa (177 aa) | 5' – AAGTTCTGTTTCAGGGCCCCGACCAAGAAGGACGCCGCGGC – 3'<br>5' – <u>CTGGTCTAGAAAGCTT</u> TTAGTCCGTATTCACATCAATCATCGG – 3'          | codon optimized ( <i>E. coli</i> ) |
| <b>HKU1 NCP<math>\Delta</math>256</b>       | ARU07581.1, S290F             | with tag: 48.6 kDa (425 aa)<br>without tag: 20.8 kDa (187 aa) | 5' – AAGTTCTGTTTCAGGGCCCCGGCGAAGGAGATCCGCCACAAAATC – 3'<br>5' – <u>CTGGTCTAGAAAGCTT</u> TTAGGCCACGGAATCTTCCACG – 3'           | codon optimized ( <i>E. coli</i> ) |
| <b>OC43 NCP<math>\Delta</math>258</b>       | AMM42450.1, A49T              | with tag: 49.2 kDa (430 aa)<br>without tag: 21.4 kDa (192 aa) | 5' – AAGTTCTGTTTCAGGGCCCCGGCCAAAGAAGTCAGACAGAAAATTTTG – 3'<br>5' – <u>CTGGTCTAGAAAGCTT</u> TTATATTTCTGAGGTGTCTTCAGTAAAGG – 3' |                                    |
| <b>NL63 NCP<math>\Delta</math>222</b>       | ABI20791.1                    | with tag: 45.3 kDa (395 aa)<br>without tag: 17.5 kDa (157 aa) | 5' – AAGTTCTGTTTCAGGGCCCCGCCGCGCGCGGATAAAC – 3'<br>5' – <u>CTGGTCTAGAAAGCTT</u> TTAATGCAGCACTTCATTAACGATCTC – 3'              | codon optimized ( <i>E. coli</i> ) |
| <b>229E NCP<math>\Delta</math>235</b>       | NP_073556.1                   | with tag: 45.1 kDa (394 aa)<br>without tag: 17.3 kDa (156 aa) | 5' – AAGTTCTGTTTCAGGGCCCCGAGACGAAAGAGCAGAAGCATG – 3'<br>5' – <u>CTGGTCTAGAAAGCTT</u> TTAATTAACCTTCATCGATGATATCGGTTTC – 3'     | codon optimized ( <i>E. coli</i> ) |

**Supplemental Table 1. Survey of recombinant CoV NCP proteins.** MW: molecular weight; aa: amino acids; *italics*: CoV NCP coding sequence; underlined: 15 bp vector homology sequence for in-fusion cloning.

| Serum panel       | Germany                    | Ghana A                                 | Ghana B       | Madagascar                                       | Nigeria                 | Colombia      | Lao PDR      |
|-------------------|----------------------------|-----------------------------------------|---------------|--------------------------------------------------|-------------------------|---------------|--------------|
| Number            | 139                        | 131                                     | 145           | 166                                              | 149                     | 40            | 20           |
| Sampling year     | 2004 - 2015                | 1999                                    | 2014 - 2015   | 2010                                             | 2018                    | 2014          | 2014         |
| Sample type       | Serum                      | Serum                                   | Serum         | Plasma                                           | Serum                   | Serum         | Serum        |
| Age (median, IQR) | 39 (28-48) <sup>§</sup>    | 22 (16-44)*                             | 6 (3-7)       | 24 (20-30)**                                     | 42 (30-58) <sup>#</sup> | 23 (21-25)    | 48 (45-53)   |
| Sex m/f (n (%))   | 72/34 (68/32) <sup>§</sup> | 70/61 (53/47)                           | 69/76 (48/52) | 166/0 (100/0) <sup>§</sup>                       | 79/70 (53/47)           | 17/23 (43/57) | 3/17 (15/85) |
| Sampling site     | Hamburg                    | Villages in the central region of Ghana | Agogo         | Manakara, Marofarihy, Tsiroanomandidy, Mananjary | Irrua                   | Valledupar    | Savannakhet  |

**Supplemental Table 2. A priori SARS-CoV-2 IgG negative serum/plasma panels.** All samples were collected from symptom-free donors prior to the COVID-19 pandemic. IQR: interquartile range (25%-75%); m: male; f: female; n: number.

<sup>§</sup> n=106 (age and sex information not available for 33 donors (all 33: age ≥ 18 years))

\* n= 88 (age information not available for 43 donors (all 43: age ≥ 18 years))

\*\* n=164 (age information not available for two donors)

<sup>§</sup> all donors: pregnant women

<sup>#</sup> n=148 (age information not available for one donor)

(A) ELISA 1 (sera 1:100, conjugate 1:20,000)

| sample       | day 1 |       |                     | day 2 |       |                     | day 3 |       |                     | CV <sub>intra, av</sub>        | mean <sub>av</sub> | sd of mean <sub>av</sub>       | CV <sub>inter</sub> |
|--------------|-------|-------|---------------------|-------|-------|---------------------|-------|-------|---------------------|--------------------------------|--------------------|--------------------------------|---------------------|
|              | mean  | sd    | CV <sub>intra</sub> | mean  | sd    | CV <sub>intra</sub> | mean  | sd    | CV <sub>intra</sub> |                                |                    |                                |                     |
| <i>pos1a</i> | 0.919 | 0.035 | 3.8                 | 0.837 | 0.009 | 1.0                 | 0.865 | 0.033 | 3.8                 | 2.9                            | 0.874              | 0.042                          | 4.8                 |
| <i>pos2a</i> | 0.492 | 0.018 | 3.6                 | 0.528 | 0.027 | 5.2                 | 0.498 | 0.020 | 4.1                 | 4.3                            | 0.506              | 0.020                          | 3.9                 |
| <i>pos3a</i> | 0.901 | 0.078 | 8.6                 | 0.935 | 0.066 | 7.1                 | 0.964 | 0.036 | 3.7                 | 6.5                            | 0.933              | 0.032                          | 3.4                 |
| <i>pos4a</i> | 2.053 | 0.030 | 1.5                 | 1.987 | 0.046 | 2.3                 | 2.042 | 0.062 | 3.0                 | 2.3                            | 2.028              | 0.035                          | 1.7                 |
| <i>neg1a</i> | 0.057 | 0.005 | 9.1                 | 0.053 | 0.006 | 10.8                | 0.048 | 0.003 | 5.3                 | 8.4                            | 0.052              | 0.005                          | 8.9                 |
| <i>neg2a</i> | 0.053 | 0.001 | 1.9                 | 0.053 | 0.010 | 19.2                | 0.047 | 0.003 | 5.6                 | 8.9                            | 0.051              | 0.004                          | 7.0                 |
| <i>neg3a</i> | 0.066 | 0.001 | 0.9                 | 0.063 | 0.001 | 1.8                 | 0.061 | 0.001 | 0.9                 | 1.2                            | 0.063              | 0.002                          | 3.4                 |
| <i>neg4a</i> | 0.049 | 0.001 | 1.2                 | 0.046 | 0.002 | 3.8                 | 0.048 | 0.002 | 4.4                 | 3.1                            | 0.047              | 0.001                          | 2.8                 |
|              |       |       |                     |       |       |                     |       |       |                     | <b>mean<sub>pos</sub>: 4.0</b> |                    | <b>mean<sub>pos</sub>: 3.4</b> |                     |
|              |       |       |                     |       |       |                     |       |       |                     | <b>mean<sub>neg</sub>: 5.4</b> |                    | <b>mean<sub>neg</sub>: 5.5</b> |                     |

(B) ELISA 2 (sera 1:2, conjugate 1:50,000)

| sample       | day 1 |       |                     | day 2 |       |                     | day 3 |       |                     | CV <sub>intra, av</sub>        | mean <sub>av</sub> | sd of mean <sub>av</sub>        | CV <sub>inter</sub> |
|--------------|-------|-------|---------------------|-------|-------|---------------------|-------|-------|---------------------|--------------------------------|--------------------|---------------------------------|---------------------|
|              | mean  | sd    | CV <sub>intra</sub> | mean  | sd    | CV <sub>intra</sub> | mean  | sd    | CV <sub>intra</sub> |                                |                    |                                 |                     |
| <i>pos1b</i> | 0.620 | 0.007 | 1.2                 | 0.529 | 0.022 | 4.1                 | 0.505 | 0.018 | 3.6                 | 2.9                            | 0.551              | 0.061                           | 11.0                |
| <i>pos2b</i> | 1.065 | 0.034 | 3.2                 | 0.981 | 0.036 | 3.7                 | 0.941 | 0.065 | 6.9                 | 4.6                            | 0.996              | 0.064                           | 6.4                 |
| <i>pos3b</i> | 1.832 | 0.059 | 3.2                 | 1.736 | 0.033 | 1.9                 | 1.711 | 0.058 | 3.4                 | 2.8                            | 1.760              | 0.064                           | 3.6                 |
| <i>pos4b</i> | 2.564 | 0.071 | 2.8                 | 2.428 | 0.066 | 2.7                 | 2.443 | 0.160 | 6.5                 | 4.0                            | 2.478              | 0.075                           | 3.0                 |
| <i>neg1b</i> | 0.061 | 0.006 | 10.0                | 0.052 | 0.001 | 2.2                 | 0.040 | 0.001 | 2.5                 | 4.9                            | 0.051              | 0.011                           | 20.9                |
| <i>neg2b</i> | 0.058 | 0.000 | 0.0                 | 0.051 | 0.004 | 7.8                 | 0.041 | 0.001 | 2.8                 | 3.5                            | 0.050              | 0.008                           | 16.7                |
| <i>neg3b</i> | 0.059 | 0.001 | 1.0                 | 0.051 | 0.002 | 4.1                 | 0.040 | 0.001 | 1.4                 | 2.2                            | 0.050              | 0.009                           | 18.4                |
| <i>neg4b</i> | 0.053 | 0.003 | 5.8                 | 0.048 | 0.002 | 3.2                 | 0.039 | 0.002 | 4.0                 | 4.3                            | 0.047              | 0.007                           | 15.4                |
|              |       |       |                     |       |       |                     |       |       |                     | <b>mean<sub>pos</sub>: 3.6</b> |                    | <b>mean<sub>pos</sub>: 6.0</b>  |                     |
|              |       |       |                     |       |       |                     |       |       |                     | <b>mean<sub>neg</sub>: 3.7</b> |                    | <b>mean<sub>neg</sub>: 17.9</b> |                     |

**Supplemental Table 3. Reproducibility of SARS-CoV-2 IgG FcγR ELISAs.** A450-A620 values were determined in triplicate for four anti-SARS-CoV-2-NCP IgG positive serum samples and four anti-SARS-CoV-2-NCP IgG negative serum samples on three different days with (A) SARS-CoV-2 IgG FcγR ELISA 1 (sera 1:100, conjugate 1:20,000) and (B) SARS-CoV-2 IgG FcγR ELISA 2 (sera 1:2, conjugate 1:50,000). Sd: standard deviation, av: average; CV<sub>intra</sub>: intraassay variation, CV<sub>inter</sub>: interassay variation.
