# Supplementary material for: Fcγ-Receptor-Based Enzyme-Linked Immunosorbent Assays for Sensitive, Specific, and Persistent Detection of Anti-SARS-CoV-2 Nucleocapsid Protein IgG Antibodies in Human Sera
Source: PubMed Central journal article supplement (PMC9199419; doi:10.1128/jcm.00075-22), 2022-05-16
Supplement: jcm.00075-22-s0003.pdf [file jcm.00075-22-s0003.pdf]

## STARD Checklist

| <b>Section and Topic</b> | <b>No.</b> | <b>Item</b>                                                                                                                                           | <b>Reported in section/paragraph</b>                                                         |
|--------------------------|------------|-------------------------------------------------------------------------------------------------------------------------------------------------------|----------------------------------------------------------------------------------------------|
| <b>TITLE or ABSTRACT</b> | 1          | Identification as a study of diagnostic accuracy using at least one measure of accuracy (such as sensitivity, specificity, predictive values, or AUC) | Title, Abstract                                                                              |
| <b>ABSTRACT</b>          | 2          | Structured summary of study design, methods, results, and conclusions (for specific guidance, see STARD for Abstracts)                                | Abstract                                                                                     |
| <b>INTRODUCTION</b>      | 3          | Scientific and clinical background, including the intended use and clinical role of the index test                                                    | Introduction                                                                                 |
|                          | 4          | Study objectives and hypotheses                                                                                                                       |                                                                                              |
| <b>METHODS</b>           |            |                                                                                                                                                       |                                                                                              |
| <i>Study design</i>      | 5          | Whether data collection was planned before the index test and reference standard were performed (prospective study) or after (retrospective study)    | Section "Material and Methods", paragraph "Human sera";<br><br>Supplemental Table 2          |
| <i>Participants</i>      | 6          | Eligibility criteria                                                                                                                                  |                                                                                              |
|                          | 7          | On what basis potentially eligible participants were identified (such as symptoms, results from previous tests, inclusion in registry)                |                                                                                              |
|                          | 8          | Where and when potentially eligible participants were identified (setting, location and dates)                                                        |                                                                                              |
|                          | 9          | Whether participants formed a consecutive, random or convenience series                                                                               |                                                                                              |
| <i>Test methods</i>      | 10a        | Index test, in sufficient detail to allow replication                                                                                                 | Section "Material and Methods", paragraph "SARS-CoV-2 IgG ELISAs"                            |
|                          | 10b        | Reference standard, in sufficient detail to allow replication                                                                                         | Section "Material and Methods", paragraphs "SARS-CoV-2 IgG IIFT" and "SARS-CoV-2 IgG ELISAs" |
|                          | 11         | Rationale for choosing the reference standard (if alternatives exist)                                                                                 |                                                                                              |
|                          | 12a        | Definition of and rationale for test positivity cut-offs or result categories of the index test, distinguishing pre-specified from exploratory        | Section "Material and Methods", paragraph "Data analysis";<br>Section "Results",             |

|                     |     |                                                                                                                                                        |                                                                              |
|---------------------|-----|--------------------------------------------------------------------------------------------------------------------------------------------------------|------------------------------------------------------------------------------|
|                     |     |                                                                                                                                                        | paragraph "Diagnostic sensitivity"                                           |
|                     | 12b | Definition of and rationale for test positivity cut-offs or result categories of the reference standard, distinguishing pre-specified from exploratory | Section "Material and Methods", paragraph "SARS-CoV-2 IgG ELISAs"            |
|                     | 13a | Whether clinical information and reference standard results were available to the performers/readers of the index test                                 | Section "Material and Methods", paragraph "Human sera"                       |
|                     | 13b | Whether clinical information and index test results were available to the assessors of the reference standard                                          |                                                                              |
| <i>Analysis</i>     | 14  | Methods for estimating or comparing measures of diagnostic accuracy                                                                                    | Section "Material and Methods", paragraph "Data analysis"                    |
|                     | 15  | How indeterminate index test or reference standard results were handled                                                                                | Legend to Supplemental Figure 4                                              |
|                     | 16  | How missing data on the index test and reference standard were handled                                                                                 | Legend to Supplemental Figure 3                                              |
|                     | 17  | Any analyses of variability in diagnostic accuracy, distinguishing pre-specified from exploratory                                                      | not applicable                                                               |
|                     | 18  | Intended sample size and how it was determined                                                                                                         |                                                                              |
| <b>RESULTS</b>      |     |                                                                                                                                                        |                                                                              |
| <i>Participants</i> | 19  | Flow of participants, using a diagram                                                                                                                  | STARD Flowchart                                                              |
|                     | 20  | Baseline demographic and clinical characteristics of participants                                                                                      | Section "Material and Methods", paragraph "Human sera", Supplemental Table 2 |
|                     | 21a | Distribution of severity of disease in those with the target condition                                                                                 |                                                                              |
|                     | 21b | Distribution of alternative diagnoses in those without the target condition                                                                            |                                                                              |
|                     | 22  | Time interval and any clinical interventions between index test and reference standard                                                                 | not applicable                                                               |
| <i>Test results</i> | 23  | Cross tabulation of the index test results (or their distribution) by the results of the reference standard                                            | Figure 4, Table 1, Table 2, Supplemental Figure 3, Supplemental Figure 4     |

|                          |    |                                                                                                       |                                                                                                  |
|--------------------------|----|-------------------------------------------------------------------------------------------------------|--------------------------------------------------------------------------------------------------|
|                          | 24 | Estimates of diagnostic accuracy and their precision (such as 95% confidence intervals)               | Section "Results", paragraph "Diagnostic sensitivity", Figure 3, Table 1                         |
|                          | 25 | Any adverse events from performing the index test or the reference standard                           | not applicable                                                                                   |
| <b>DISCUSSION</b>        | 26 | Study limitations, including sources of potential bias, statistical uncertainty, and generalisability | Section "Discussion", paragraph "Caveats and limitations"                                        |
|                          | 27 | Implications for practice, including the intended use and clinical role of the index test             |                                                                                                  |
| <b>OTHER INFORMATION</b> | 28 | Registration number and name of registry                                                              | HRECs (Human research Ethics Committees): Section "Material and Methods", paragraph "Human sera" |
|                          | 29 | Where the full study protocol can be accessed                                                         | not applicable                                                                                   |
|                          | 30 | Sources of funding and other support; role of funders                                                 | Section "Authors' Disclosures, Potential Conflicts of Interest"                                  |

## SARS-CoV-2 patient sera

**Participants with confirmed SARS-CoV-2 infection**  
PCR-positive swab (Germany, March 2020- May 2021)  
mild ambulatory disease (non-hospitalized patients)  
N=35 (23 females, 12 males)  
median age: 45, range age: 19-64

### Longitudinal serum samples

n=213  
1 - 13 sera per patient (median 6 sera)  
range of days post onset of symptoms: 10 - 446)

N: # patients  
n: # sera

## Pre-pandemic negative control sera

**Symptom-free blood donors** from  
Germany (N=139), 51 samples OC43/HKU1 IgG pos  
Ghana (N=276), 67 samples OC43/HKU1 IgG pos  
Madagascar (N=166), 30 samples OC43/HKU1 IgG pos  
Nigeria (N=149), 79 samples OC43/HKU1 IgG pos  
Colombia (N=40), 12 samples OC43/HKU1 IgG pos  
Lao PDR (N=20), 5 samples OC43/HKU1 IgG pos

### Analysis with SARS-CoV-2 IgG FcγR ELISAs (index tests)

ELISA 1: final serum dilution: 1:100, final conjugate dilution: 1:20,000

ELISA 2: final serum dilution: 1:2, final conjugate dilution: 1:50,000

**Analysis with SARS-CoV-2 IgG IIFT** (reference test 1, all samples)

**Analysis with EUROIMMUN Anti-SARS-CoV-2-NCP-ELISA (IgG)**  
(reference test 2, subset of patient samples, all negative control samples)
